# Supplementary material
Source: PubMed Central journal article supplement (PMC6645200)
Supplement: Supp_TableS3.pdf [file Supp_TableS3.pdf]

SUPPLEMENTARY TABLE S3. MEASURES OF OBSTETRIC/GYNECOLOGIC HISTORY BY SEX HORMONE TERTILES FOR WOMEN IN THE MULTI-ETHNIC STUDY OF ATHEROSCLEROSIS VISIT 1 (2000–2002)

|                                            | <i>Free T tertile 1</i> | <i>Free T tertile 2</i> | <i>Free T tertile 3</i> | <i>p-value</i> |
|--------------------------------------------|-------------------------|-------------------------|-------------------------|----------------|
| No. of participants                        | 461                     | 455                     | 452                     |                |
| Age at first live birth (years), mean (SD) | 23.9 (5.4)              | 23.7 (5.2)              | 23.6 (5.2)              | 0.68           |
| Number of live births, <i>n</i> (%)        |                         |                         |                         |                |
| 0                                          | 84 (18.2%)              | 70 (15.4%)              | 63 (13.9%)              | 0.18           |
| 1                                          | 64 (13.9%)              | 71 (15.6%)              | 58 (12.8%)              |                |
| 2                                          | 122 (26.5%)             | 99 (21.8%)              | 117 (25.9%)             |                |
| 3                                          | 85 (18.4%)              | 79 (17.4%)              | 98 (21.7%)              |                |
| 4                                          | 44 (9.5%)               | 63 (13.8%)              | 48 (10.6%)              |                |
| ≥5                                         | 62 (13.4%)              | 73 (16.0%)              | 68 (15.0%)              |                |
| History of oophorectomy                    | 136 (29.5%)             | 101 (22.2%)             | 79 (17.5%)              | <0.001         |
| Age at menopause (years), mean (SD)        | 47.6 (6.2)              | 48.1 (6.2)              | 48.4 (6.1)              | 0.11           |
|                                            | <i>SHBG tertile 1</i>   | <i>SHBG tertile 1</i>   | <i>SHBG tertile 1</i>   | <i>p-value</i> |
| No. of participants                        | 456                     | 457                     | 455                     |                |
| Age at first live birth (years), mean (SD) | 23.5 (5.2)              | 23.8 (5.3)              | 23.8 (5.3)              | 0.62           |
| Number of live births, <i>n</i> (%)        |                         |                         |                         |                |
| 0                                          | 66 (14.5%)              | 67 (14.7%)              | 84 (18.5%)              | 0.17           |
| 1                                          | 59 (12.9%)              | 72 (15.8%)              | 62 (13.6%)              |                |
| 2                                          | 117 (25.7%)             | 101 (22.1%)             | 120 (26.4%)             |                |
| 3                                          | 97 (21.3%)              | 80 (17.5%)              | 85 (18.7%)              |                |
| 4                                          | 48 (10.5%)              | 65 (14.2%)              | 42 (9.2%)               |                |
| ≥5                                         | 69 (15.1%)              | 72 (15.8%)              | 62 (13.6%)              |                |
| History of oophorectomy                    | 81 (17.8%)              | 100 (21.9%)             | 135 (29.7%)             | <0.001         |
| Age at Menopause (years), mean (SD)        | 48.4 (6.1)              | 48.1 (6.2)              | 47.5 (6.2)              | 0.090          |

All sex hormone levels are measured in nM.
