# Supplementary material
Source: PubMed Central journal article supplement (PMC6645200)
Supplement: Supp_TablesS1-S2.pdf [file Supp_TablesS1-S2.pdf]

## Supplementary Data

SUPPLEMENTARY TABLE S1. BASELINE SEX HORMONE LEVELS OF THE PARTICIPANTS IN THE MULTI-ETHNIC STUDY OF ATHEROSCLEROSIS VISIT 1 (2000–2002)

| <i>Sex hormone level</i>                       | <i>All participants</i> | <i>Women</i>   | <i>Men</i>     | <i>p-value</i> |
|------------------------------------------------|-------------------------|----------------|----------------|----------------|
| No. of participants                            | 3075                    | 1368           | 1707           |                |
| Log total testosterone, mean (SD)              | 1.389 (1.486)           | -0.157 (0.638) | 2.627 (0.451)  | <0.001         |
| One SD of log total testosterone, mean (SD)    | 0.935 (1.000)           | -0.105 (0.430) | 1.768 (0.304)  | <0.001         |
| Log bioavailable testosterone, mean (SD)       | 0.195 (1.738)           | -1.614 (0.811) | 1.637 (0.465)  | <0.001         |
| One SD of bioavailable testosterone, mean (SD) | 0.112 (1.000)           | -0.929 (0.467) | 0.942 (0.267)  | <0.001         |
| Log estradiol, mean (SD)                       | -2.325 (0.709)          | -2.474 (0.949) | -2.206 (0.391) | <0.001         |
| One SD of log estradiol, mean (SD)             | -3.279 (1.000)          | -3.489 (1.338) | -3.112 (0.552) | <0.001         |
| Log DHEA, mean (SD)                            | 2.444 (0.528)           | 2.315 (0.549)  | 2.547 (0.487)  | <0.001         |
| One SD of log DHEA, mean (SD)                  | 4.624 (1.000)           | 4.380 (1.040)  | 4.820 (0.922)  | <0.001         |
| Log free testosterone, mean (SD)               | 0.458 (0.445)           | 0.185 (0.476)  | 0.676 (0.261)  | <0.001         |
| One SD of log testosterone mean (SD)           | 1.029 (1.000)           | 0.416 (1.069)  | 1.520 (0.587)  | <0.001         |
| Log SHBG, mean (SD)                            | 3.884 (0.552)           | 4.133 (0.610)  | 3.685 (0.401)  | <0.001         |
| One SD of log SHBG, mean (SD)                  | 7.042 (1.000)           | 7.493 (1.106)  | 6.680 (0.726)  | <0.001         |
| Log T/E ratio, mean (SD)                       | 3.714 (1.515)           | 2.317 (1.151)  | 4.833 (0.508)  | <0.001         |
| One SD of log T/E ratio, mean (SD)             | 2.451 (1.000)           | 1.529 (0.759)  | 3.190 (0.335)  | <0.001         |

Results are expressed as mean and standard deviation of the log-transformed sex hormone levels.

All sex hormone levels are measured in nM, T/E a unitless ratio.

SD, standard deviation; DHEA, dehydroepiandrosterone; SHBG, sex hormone binding globulin; T/E ratio, testosterone/estrogen ratio.

SUPPLEMENTARY TABLE S2. MEASURES OF BRACHIAL REACTIVITY STRATIFIED BY TERTILES OF SEX HORMONES FOR MEN AND WOMEN IN THE MULTI-ETHNIC STUDY OF ATHEROSCLEROSIS VISIT 1 (2000–2002)

|                                     | <i>Free T tertile 1</i> | <i>Free T tertile 2</i> | <i>Free T tertile 3</i> | <i>p-value</i> |
|-------------------------------------|-------------------------|-------------------------|-------------------------|----------------|
| <b>Women</b>                        |                         |                         |                         |                |
| No. of participants                 | 461                     | 455                     | 452                     |                |
| Baseline diameter (mm), mean (SD)   | 3.697 (0.596)           | 3.868 (0.611)           | 3.999 (0.639)           | <0.001         |
| FMD absolute change (mm), mean (SD) | 0.169 (0.102)           | 0.156 (0.090)           | 0.169 (0.093)           | 0.071          |
| FMD % change, mean (SD)             | 4.755 (3.127)           | 4.229 (2.710)           | 4.417 (2.659)           | 0.018          |
| <b>Men</b>                          |                         |                         |                         |                |
| No. of participants                 | 572                     | 572                     | 563                     |                |
| Baseline diameter (mm), mean (SD)   | 4.836 (0.678)           | 4.836 (0.709)           | 4.852 (0.668)           | 0.91           |
| FMD absolute change (mm), mean (SD) | 0.168 (0.101)           | 0.182 (0.105)           | 0.202 (0.109)           | <0.001         |
| FMD % change, mean (SD)             | 3.618 (2.347)           | 3.894 (2.383)           | 4.326 (2.476)           | <0.001         |
|                                     | <i>SHBG tertile 1</i>   | <i>SHBG tertile 2</i>   | <i>SHBG tertile 3</i>   | <i>p-value</i> |
| <b>Women</b>                        |                         |                         |                         |                |
| No. of participants                 | 456                     | 457                     | 455                     |                |
| Baseline diameter (mm), mean (SD)   | 3.994 (0.634)           | 3.866 (0.611)           | 3.700 (0.603)           | <0.001         |
| FMD absolute change (mm), mean (SD) | 0.169 (0.093)           | 0.157 (0.090)           | 0.168 (0.102)           | 0.11           |
| FMD % change, mean (SD)             | 4.407 (2.654)           | 4.253 (2.716)           | 4.744 (3.136)           | 0.029          |
| <b>Men</b>                          |                         |                         |                         |                |
| No. of participants                 | 574                     | 564                     | 569                     |                |
| Baseline diameter (mm), mean (SD)   | 4.844 (0.685)           | 4.867 (0.695)           | 4.812 (0.675)           | 0.40           |
| FMD absolute change (mm), mean (SD) | 0.202 (0.110)           | 0.181 (0.104)           | 0.168 (0.101)           | <0.001         |
| FMD % change, mean (SD)             | 4.332 (2.496)           | 3.851 (2.352)           | 3.644 (2.354)           | <0.001         |

Results are expressed as mean and standard deviation of the FMD parameter.

All sex hormone levels are measured in nM.

FMD, flow-mediated dilation; Free T, free testosterone.
